# Supplementary material for: Overview of the Manitou Experimental Forest Observatory: site description and selected science results from 2008 to 2013
Source: Copernicus journal article supplement (doi:10.5194/acp-14-6345-2014), 2014-06-26
Supplement: Supplementary file 1 [file acp-14-6345-2014-supplement.pdf]

Supplement of Atmos. Chem. Phys., 14, 6345–6367, 2014  
<http://www.atmos-chem-phys.net/14/6345/2014/>  
doi:10.5194/acp-14-6345-2014-supplement  
© Author(s) 2014. CC Attribution 3.0 License.

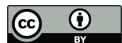

*Supplement of*

## **Overview of the Manitou Experimental Forest Observatory: site description and selected science results from 2008 to 2013**

**J. Ortega et al.**

*Correspondence to:* J. N. Smith ([jimsmith@ucar.edu](mailto:jimsmith@ucar.edu))

Table S1: Summary of gas-phase, aerosol, meteorological and hydrological measurements at the Manitou Experimental Forest Observatory.

| <b>Chemistry tower</b>                                       |                                                                                                                   |                                                                                                                                                                                  |                    |                          |
|--------------------------------------------------------------|-------------------------------------------------------------------------------------------------------------------|----------------------------------------------------------------------------------------------------------------------------------------------------------------------------------|--------------------|--------------------------|
| <b>Measurement</b>                                           |                                                                                                                   | <b>Instrumentation</b>                                                                                                                                                           | <b>Institution</b> | <b>Time coverage</b>     |
| Wind speed and direction, temperature, humidity and pressure | 2D sonic anemometer                                                                                               | Vaisala, Model WXT520 deployed at 4 heights (1.8, 7.0, 14.1, and 27.8 m)                                                                                                         | NCAR               | Aug 2009 - present       |
| Wind speed and direction, turbulence                         |                                                                                                                   | Campbell Scientific model CSAT-3 at 25.1 m                                                                                                                                       | NCAR               | September 2008 – present |
| CO <sub>2</sub> , water, latent heat, sensible heat fluxes   | Eddy Covariance and by using canopy gradients                                                                     | Campbell Sonic Anemometer, Li-COR 7000 and 6262 CO <sub>2</sub> /H <sub>2</sub> O EC inlet at 25.1 m. Gradient at 6 measurement heights (1.6, 5.0, 8.5, 12.0, 17.7 and 25.1 m)*. | NCAR               | September 2008-June 2012 |
| Photosynthetically-active radiation (PAR)                    | Quantum sensor                                                                                                    | Licor model LI190SA at 2 m and 28 m; Apogee LQS Sensors (2, 4, 8 m)                                                                                                              | NCAR               | August 2009 – present    |
| Direct and diffuse beam PAR                                  | Quantum sensor                                                                                                    | Delta T Instruments, model BF3 (28 m)                                                                                                                                            | NCAR               | November 2009 – present  |
| NO, NO <sub>2</sub> , NO <sub>x</sub>                        | NO by O <sub>3</sub> -induced chemiluminescence, NO <sub>2</sub> converted to NO using heated Molybdenum catalyst | Ecophysics, Model 88Y at 6 sampling heights (*see heights above)                                                                                                                 | NCAR               | June 2009 – June 2012    |

| at 380 °C                                                                                                                               |                                                                                                                      |                                                                                                                                         |                                |                                                                                |
|-----------------------------------------------------------------------------------------------------------------------------------------|----------------------------------------------------------------------------------------------------------------------|-----------------------------------------------------------------------------------------------------------------------------------------|--------------------------------|--------------------------------------------------------------------------------|
| CO                                                                                                                                      | Non-dispersive infrared absorption                                                                                   | Thermo Environmental model 48 at 3 m                                                                                                    | NCAR                           | Summer of 2010, July 2011-June 2012                                            |
| SO <sub>2</sub>                                                                                                                         | UV-fluorescence                                                                                                      | Thermo-Environmental, Model 43C-TLE (*see heights above)                                                                                | NCAR                           | June 2009-June 2012                                                            |
| Ozone                                                                                                                                   | UV absorption                                                                                                        | 2B technologies model 205 (*see heights above)                                                                                          | NCAR                           | June 2009-June 2012                                                            |
| Volatile organic compounds (Methyl methyl-3-buten-2-ol, isoprene, monoterpenes, other Alkenes, aromatics, alcohols, ketones, aldehydes) | Proton transfer reaction mass spectrometry (PTR-MS, PTR-TOF-MS)                                                      | Ionicon Quadrupole, Univ. Innsbruck Time of Flight (TOF). Above canopy concentrations, eddy covariance fluxes and gradient measurements | NCAR, University of Innsbruck, | 2008 (DOY 240-284), 2009 (DOY 121-246), 2010 (DOY 220-312), 2011 (DOY 201-238) |
| Size-Resolved Particle Number Fluxes (6.04-523.3 nm)                                                                                    | Fast size distributions coupled with eddy covariance                                                                 | TSI Fast Mobility Particle sizer (FMPS, model 3091)                                                                                     | Indiana University             | July - August 2011                                                             |
| Size Distributions of PBAP 0.6-20 µm, 1-100 µm. Total aerosol size distribution and in-canopy aerosol fluxes, 0.055-1.0 µm              | Ultraviolet (for primary biological particles) and optical (bulk) particle sizers profiling canopy using tower winch | WIBS-4 & UHSAS                                                                                                                          | University of Manchester, UK   | July - August 2011                                                             |
| <b>Micrometeorology Tower</b>                                                                                                           |                                                                                                                      |                                                                                                                                         |                                |                                                                                |
| Measurement                                                                                                                             | Technique                                                                                                            | Instrumentation                                                                                                                         | Institution                    | Time coverage                                                                  |
| Wind speed, direction, sonic temperature                                                                                                | 3D sonic anemometer                                                                                                  | Campbell Scientific, model CSAT-3. 5 levels: 2, 8, 16, 29 and 43 m sampled at 20 Hz                                                     | NCAR                           | July 2009 – July 2012                                                          |
| CO <sub>2</sub> , H <sub>2</sub> O                                                                                                      | Infrared gas analysis                                                                                                | LI-COR 7500. 4 levels: 2, 8, 16, 43 m sampled at 10 Hz                                                                                  | NCAR                           | Nov 2009 – July 2012                                                           |
| Atmospheric pressure                                                                                                                    | Barometer                                                                                                            | Vaisala PTB220 sampling at 1 Hz                                                                                                         | NCAR                           | Nov 2009 – July 2012                                                           |
| Temperature, Relative humidity                                                                                                          | Radiation shielded and aspirated humitter and resistive temperature                                                  | NCAR–Vaisala 50Y Humitter. 5 levels: 2, 8, 16, 29 and 43 m sampled at 1 Hz                                                              | NCAR                           | July 2009 – July 2012                                                          |

|                                                              |                                                                                      |                                                                                                                                           |                                       |                                                                 |
|--------------------------------------------------------------|--------------------------------------------------------------------------------------|-------------------------------------------------------------------------------------------------------------------------------------------|---------------------------------------|-----------------------------------------------------------------|
| Radiation                                                    | 4-component net radiometer                                                           | Kipp and Zonen, model CNR-1. Above-canopy measurement at 22m. Upwelling and downwelling shortwave and longwave radiation measured at 1 Hz | NCAR                                  | Nov 2009 – July 2012                                            |
| <b>Peripheral measurements-1 (gas-phase)</b>                 |                                                                                      |                                                                                                                                           |                                       |                                                                 |
| <b>Measurement</b>                                           | <b>Technique</b>                                                                     | <b>Instrumentation</b>                                                                                                                    | <b>Institution</b>                    | <b>Time coverage</b>                                            |
| Volatile Organic Compounds (concentrations)                  | Total Organic Gas Analyzer (TOGA); Fast GCMS method                                  | Custom cryo-trapping and desorption GC system with quadrupole MS detection (60 seconds per GC run); Apel et al., 2010                     | NCAR                                  | August 2010                                                     |
| NO <sub>3</sub> , N <sub>2</sub> O <sub>5</sub>              | Cavity Ringdown Spectroscopy                                                         | NOAA custom-built system (Dube et al., 2006; Wagner et al., 2011)                                                                         | Reed college and NOAA                 | July - August 2011                                              |
| HO <sub>x</sub> (OH, HO <sub>2</sub> , and RO <sub>2</sub> ) | Chemical ionization mass spectrometry                                                | Extrel quadrupole system with a Custom made ionization system (Eisele and Tanner, 1991)                                                   | NCAR                                  | August 2010, August 2011                                        |
| H <sub>2</sub> SO <sub>4</sub>                               | Chemical ionization mass spectrometry                                                | Extrel quadrupole system with a Custom made ionization system (Eisele and Tanner, 1993)                                                   | NCAR                                  | August 2010, August 2011                                        |
| OH reactivity                                                | Laser pump-probe Laser induced fluorescence (LIF)                                    | Tokyo Metropolitan University LIF (Sadanaga et al., 2004)                                                                                 | Tokyo Metropolitan University         | Summer 2010                                                     |
| Formaldehyde (HCHO) concentration and flux                   | Fiber Laser-induced fluorescence (FILIF)                                             | Madison FILIF instrument (Hottle et al., 2012)                                                                                            | University of Wisconsin Madison       | August 2010 (DOY 224-237; 241-243 flux, 217-237; 241-243 conc.) |
| Glyoxal (CHOCHO)                                             | Laser-Induced Phosphorescence (LIP)                                                  | Madison LIP instrument (Huisman et al., 2008)                                                                                             | University of Wisconsin Madison       | August 2010 (DOY 227-243)                                       |
| Intermediate and semi-volatile gas-phase organic compounds   | Cryotrapping followed by temperature programmed desorption into electron impact mass | Instrument described in Cross et al., 2013                                                                                                | Massachusetts Institute of Technology | July - August 2011                                              |

| spectrometry (EI-MS)                                                                              |                                                                                                                                       |                                                                                                                                                  |                                                                       |                          |
|---------------------------------------------------------------------------------------------------|---------------------------------------------------------------------------------------------------------------------------------------|--------------------------------------------------------------------------------------------------------------------------------------------------|-----------------------------------------------------------------------|--------------------------|
| <b>Peripheral measurements-2 (particle-phase)</b>                                                 |                                                                                                                                       |                                                                                                                                                  |                                                                       |                          |
| Chemical composition of nano-particles                                                            | Thermal Desorption Chemical Ionization Mass Spectrometry (TDCIMS)                                                                     | TDCIMS with quadrupole (2008) and HRTOF (2011) mass spectrometers (Smith et al., 2004)                                                           | NCAR                                                                  | July 2008, August 2011   |
| Particle size distributions                                                                       | 1. nano-Scanning Mobility Particle Sizer (SMPS, 3-50 nm); 2. regular SMPS (40-350 nm); 3. optical particle counter (200 nm – 2.5 µm)  | 1-TSI model 3085 nano-DMA with model 3025 CPC; 2-TSI model 3081 Long-DMA with model 3760 CPC; 3-Particle Measurement Systems Lasair (model 1002) | NCAR                                                                  | February 2010 – Jan 2012 |
| Particle size distributions (5 nm - 32 µm)                                                        | Wide Range Aerosol Spectrometer (WRAS)                                                                                                | Grimm Model EDM 665                                                                                                                              | Max Planck Institute for Chemistry                                    | July - August 2011       |
| Particle size distributions                                                                       | Scanning mobility particle sizer (10-600 nm)                                                                                          | TSI model 3080 classifier using TSI model 3081 long column DMA and TSI model 3010 CPC.                                                           | University of Colorado, Boulder                                       | July 2011 – June 2012    |
| Particle size distributions of total particles and fluorescent biological particles (0.5 – 20 µm) | Ultraviolet aerodynamic particle sizer (UV-APS)                                                                                       | TSI model 3014                                                                                                                                   | Max Planck Institute for Chemistry                                    | July 2011 – June 2012    |
| Ice nuclei (IN) and bioaerosol characterization                                                   | Multiple Orifice Uniform Deposition Impactor (MOUDI) analyzed via droplet freezing technique (UBC) and fluorescence microscopy (MPIC) | MSP Model 110-R                                                                                                                                  | Max Planck Institute for Chemistry and University of British Columbia | July - August 2011       |
| Particle elemental composition, characterization, and imaging                                     | Low-volume filters (gold-coated Nuclepore) analyzed via scanning electron microscopy (SEM)                                            | Scanning electron microscopy                                                                                                                     | Max Planck Institute for Chemistry                                    | July - August 2011       |
| Particle elemental composition and characterization                                               | Low-volume impactors (silicon nitride windows) analyzed via scanning transmission x-ray microscopy with near-                         | X-ray microscopy and near-edge x-ray absorption                                                                                                  | Max Planck Institute for Chemistry                                    | July - August 2011       |

|                                                                            |                                                                                                                    |                                                                                  |                                                                            |                                 |
|----------------------------------------------------------------------------|--------------------------------------------------------------------------------------------------------------------|----------------------------------------------------------------------------------|----------------------------------------------------------------------------|---------------------------------|
|                                                                            | edge x-ray absorption fine structure analysis (STXM-NEXAFS)                                                        |                                                                                  |                                                                            |                                 |
| Particle imaging                                                           | Low volume impactors (TEM grids) analyzed via transmission electron microscopy (TEM)                               | Transmission electron microscopy                                                 | Max Planck Institute for Chemistry                                         | July - August 2011              |
| Biological organism DNA speciation                                         | High-volume filters (glass fiber) analyzed via polymerase chain reaction (PCR) technique                           | Digitel DHA-80                                                                   | Max Planck Institute for Chemistry                                         | July - August 2011              |
| Culturable biological particle identification and ice activity             | Direct-to-agar impactor samplers (time-resolved/slit and size-resolved/6-stage) analyzed via PCR and drop freezing | Andersen Bioaerosol Sampler                                                      | Max Planck Institute for Chemistry                                         | July - August 2011              |
| Cloud condensation nuclei (CCN)                                            | Continuous-flow streamwise thermal-gradient CCN chamber sampling bulk (2008) and size selected particles           | Droplet Measurement Technologies model CCN-100 with TSI DMA and particle counter | Colorado State University (2010-2011); Washington State University (2008); | July 2008, March 2010- May 2011 |
| Ice Nuclei (IN)                                                            | Continuous Flow Diffusion Chamber (CFDC)                                                                           | Manufactured at CSU following Rogers et al., 2001                                | Colorado State University (CSU)                                            | July 2008, July – August 2011   |
| Primary biological aerosol particle (PBAP) speciation                      | Sampling with offline analysis                                                                                     | Biosampler with PCR/sequencing                                                   | Colorado State University                                                  | July - August 2011              |
| Black carbon mass, size distribution and mixing state                      | Single Particle soot spectrometer                                                                                  | Droplet Measurement Technologies, model SP2                                      | Los Alamos National Laboratory                                             | July - August 2011              |
| 3-wavelength aerosol absorption and scattering                             | 3-Wavelength Photo-acoustic Sensors, 2-Vis/IR, 1-UV                                                                | Droplet Measurement Technologies, model PASS-3                                   | Los Alamos National Laboratory                                             | July - August 2011              |
| Aerosol volatility-resolved 3-wavelength aerosol absorption and scattering | Thermal denuder with 3-Wavelength Photo-acoustic Sensors, 2-Vis/IR, 1-UV                                           | Droplet Measurement Technologies, model PASS-3                                   | Los Alamos National Laboratory                                             | July - August 2011              |
| Sub-micron non-refractory bulk and size-resolved aerosol composition       | Aerosol mass spectrometry                                                                                          | HR-TOF-AMS (DeCarlo et al., 2006)                                                | University of Colorado, Boulder;                                           | July - August 2011              |
| Aerosol volatility-resolved aerosol composition                            | Thermal denuder (Huffman et al., 2009) with aerosol mass                                                           | Aerodyne thermal denuder with HR-TOF-AMS                                         | University of Colorado, Boulder                                            | July - August 2011              |

|                                                                                                                                   |                                                                                                 |                                                                                                                                                                                                 |                                                          |                             |
|-----------------------------------------------------------------------------------------------------------------------------------|-------------------------------------------------------------------------------------------------|-------------------------------------------------------------------------------------------------------------------------------------------------------------------------------------------------|----------------------------------------------------------|-----------------------------|
|                                                                                                                                   | spectrometry                                                                                    | (DeCarlo et al., 2006)                                                                                                                                                                          |                                                          |                             |
| Aerosol volatility-resolved 3-wavelength aerosol absorption and scattering                                                        | Thermal denuder with 3-Wavelength Photo-acoustic Sensors, 2-Vis/IR, 1-UV                        | Droplet Measurement Technologies, model PASS-3                                                                                                                                                  | Los Alamos National Laboratory                           | July - August 2011          |
| Sub-micron non-refractory bulk and size-resolved aerosol composition                                                              | Aerosol mass spectrometry                                                                       | HR-TOF-AMS (DeCarlo et al., 2006)                                                                                                                                                               | University of Colorado, Boulder;                         | July - August 2011          |
| Aerosol volatility-resolved aerosol composition                                                                                   | Thermal denuder (Huffman et al., 2009) with aerosol mass spectrometry                           | Aerodyne thermal denuder with HR-TOF-AMS (DeCarlo et al., 2006)                                                                                                                                 | University of Colorado, Boulder                          | July - August 2011          |
| MBO-derived epoxides                                                                                                              | High volume filter samples                                                                      | Filter sampler and offline GC/MS and LC/MS analysis                                                                                                                                             | University of North Carolina                             | July - August 2011          |
| Organic speciation, biomarkers including precursor-specific SOA tracers, EC/OC and <sup>14</sup> C of EC/OC for PM <sub>2.5</sub> | High volume filter samples                                                                      | Filter sampler and offline analysis                                                                                                                                                             | United States EPA                                        | July - August 2011          |
| Lipids, carbohydrates, proteins constituents of aerosol                                                                           | High volume filter samples                                                                      | Quartz filters with offline analysis                                                                                                                                                            | University of Colorado, Boulder                          | Summers of 2008, 2009, 2011 |
| Particulate elemental carbon and organic carbon                                                                                   | Thermal-optical method                                                                          | Sunset EC/OC                                                                                                                                                                                    | University of Colorado, Boulder                          | July - August 2011          |
| <b>Peripheral measurements-3 (mixed gas + aerosol-phase)</b>                                                                      |                                                                                                 |                                                                                                                                                                                                 |                                                          |                             |
| Aerosol- and gas-phase chemistry of ambient air in a highly oxidizing environment                                                 | Ambient sampling via oxidant flow reactor with addition of OH, NO <sub>3</sub> , O <sub>3</sub> | 2 x Potential Aerosol Mass (PAM) oxidant flow reactors (Kang et al., 2007, Ortega et al., 2013); Oxidants: OH, O <sub>3</sub> , NO <sub>3</sub> ; analysis by Aerodyne AMS, PTR-TOF-MS and SMPS | University of Colorado, Boulder; University of Innsbruck | July - August 2011          |
| NO <sub>2</sub> , PANs, HNO <sub>3</sub> , Alkyl nitrates (gas & aerosol using denuder)                                           | Thermal Desorption - Laser induced fluorescence                                                 | Custom-built system (Day et al., 2002, Rollins et al., 2010)                                                                                                                                    | Reed College and University of California, Berkeley      | July - August 2011          |
| Gas- and particle-phase organic acids composition and partitioning-1                                                              | Micro-Orifice Volatilization Impactor High-Resolution Time-of-Flight Chemical                   | Aerodyne Research Inc. MOVII-HRToF-CIMS (Yatavelli et al. 2012, Yatavelli et                                                                                                                    | University of Colorado, Boulder                          | July - August 2011          |

|                                                                      |                                                                                                                     |                                                                                                                        |                                   |                        |
|----------------------------------------------------------------------|---------------------------------------------------------------------------------------------------------------------|------------------------------------------------------------------------------------------------------------------------|-----------------------------------|------------------------|
|                                                                      | Ionization Mass Spectrometer (MOVI-HRToF-CIMS) using acetate reagent ion                                            | al., 2014)                                                                                                             |                                   |                        |
| Gas- and particle-phase organic acids composition and partitioning-2 | Atmospheric Pressure Chemical Ionization Ion Trap Mass Spectrometry using O <sub>2</sub> - reagent ion (APCI-IT-MS) | Custom-built instrument (as described by Hoffman et al., 2002 and Vogel et al. 2013)                                   | University of Mainz               | July - August 2011     |
| Simultaneous bulk and speciated organics in gas and particle phases  | Thermal Desorption Gas Chromatography Mass Spectrometry and Aerosol Mass Spectrometry                               | Semi-Volatile Thermal desorption Aerosol Gas chromatograph / Aerosol Mass Spectrometry (SV-TAG-AMS; Zhao et al., 2013) | University of California Berkeley | July - August 2011     |
| Ambient neutral molecular clusters                                   | Chemical ionization mass spectrometry                                                                               | Cluster-Chemical Ionization Mass Spectrometer (Zhao et al., 2010)                                                      | NCAR                              | July 2008              |
| <b>Peripheral measurements-4 (hydrological)</b>                      |                                                                                                                     |                                                                                                                        |                                   |                        |
| Precipitation (rain)                                                 | Tipping buckets                                                                                                     | Texas Electronics model USW525. 11 tipping buckets distributed around chemistry tower                                  | NCAR                              | July 2009-present      |
| Precipitation (total)                                                | Weighing total precipitation gauge                                                                                  | Environmental Technologies Inc., Noah-II (5 minute averaging)                                                          | NCAR                              | February 2010-present  |
| Snow depth                                                           | Laser snow depth sensor                                                                                             | Jenoptik, Inc. SHM30                                                                                                   | NCAR                              | 2010-present.          |
| Soil moisture                                                        | Frequency domain reflectometry                                                                                      | Decagon EC-5 probes (3 sites around flux tower extending 1 m into soil)                                                | NCAR                              | June 2010-present      |
| Soil temperature                                                     | Thermistor                                                                                                          | Campbell Scientific T107 (co-located with soil moisture above).                                                        | NCAR                              | June 2010-present      |
| <b>Peripheral measurements-5 (biological)</b>                        |                                                                                                                     |                                                                                                                        |                                   |                        |
| Sap flow                                                             | Compensation Heat Pulse Method                                                                                      | Made in house, following Burgess et al. 2001                                                                           | NCAR                              | May 2010-December 2011 |
| Soil VOC emissions                                                   | Static (University of Colorado) and dynamic (NCAR)                                                                  | Custom-built chambers with automated lid                                                                               | NCAR, University of Colorado      | July 2008              |



|                                                                                       |                                                                      |                                                                                         |                                                         |                                                             |
|---------------------------------------------------------------------------------------|----------------------------------------------------------------------|-----------------------------------------------------------------------------------------|---------------------------------------------------------|-------------------------------------------------------------|
|                                                                                       | chamber approaches, measuring VOC abundances by PTR-MS               | control. Measurements by Ionicon PTR-MS and NCAR PTR-MS                                 | Boulder                                                 |                                                             |
| Leaf-level photosynthesis and respiration                                             | 2-channel infrared gas analyzer (CO <sub>2</sub> + H <sub>2</sub> O) | Licor Model 6262                                                                        | NCAR                                                    | Campaign-style measurements each growing season (2008-2012) |
| Leaf-level BVOC emission measurements                                                 | VOC trapping onto solid adsorbents followed by GC-FID /MS analysis   | Flow through cuvettes with light and temperature control                                | NCAR                                                    | Campaign-style measurements each growing season (2008-2012) |
| Tree branch gas exchange                                                              | Infrared gas analysis                                                | LiCor Model 6400                                                                        | University of Colorado, Boulder                         | July - August 2011                                          |
| Tree branch VOC emissions                                                             | Proton transfer reaction mass spectrometry (PTR-MS)                  | Ionicon PTR-MS                                                                          | University of Colorado, Boulder                         | July - August 2011                                          |
| <b>Peripheral measurements-6 (miscellaneous)</b>                                      |                                                                      |                                                                                         |                                                         |                                                             |
| Understory radiation and flux of latent heat, sensible heat water and CO <sub>2</sub> | Eddy covariance, radiometer                                          | Campbell C-SAT sonic anemometer; open-path infrared gas analyzer and krytpon hygrometer | NCAR                                                    | 2011-2012                                                   |
| NO <sub>2</sub> photolysis                                                            | Actinic flux filter radiometry                                       | Metcon jNO <sub>2</sub> filter radiometers                                              | NCAR                                                    | Outside and within canopy (August 2010, July-Aug 2011)      |
| Actinic flux (product of photolysis frequencies)                                      | Spectrally-resolved diode array                                      | Metcon Spectrograph with Diode Array Detector                                           | NCAR                                                    | Top of chemistry tower (July-August 2011).                  |
| Actinic flux and jNO <sub>2</sub>                                                     | Diode array actinic flux spectroradiometer (DAAFS)                   | Metcon with jNO <sub>2</sub> filter                                                     | University of Houston                                   | August 2011                                                 |
| Water isotopes                                                                        | Cavity ring-down spectrometry                                        | Picarro L2120-i                                                                         | Univ. of Arizona (2010), Univ. Colorado, Boulder (2011) | August 2010, May-October 2011                               |
| Boundary layer height and atmospheric structure                                       | Ceilometer                                                           | Vaisala CL-31 (Haman et al. 2012)                                                       | University of Houston                                   | August 2010, July-August 2011                               |

Abbreviations:

NOAA – National Oceanic and Atmospheric Administration

NCAR – National Center for Atmospheric Research

EPA –Environmental Protection Agency

CPC – Condensational Particle Counter

DMA – Differential Mobility Analyzer

UHSAS – Ultra-high Sensitivity Aerosol Spectrometer

CSU – Colorado State University

PCR - Polymerase Chain Reaction

EC/OC – Elemental Carbon/Organic Carbon

GC-FID/MS – Gas chromatography with Flame Ionization Detector and Mass Spectrometer

Table S2: Selected studies of BEACHON (Bio-hydro-atmosphere interactions of Energy, Aerosols, Carbon, H<sub>2</sub>O, Organics & Nitrogen) field campaigns at the Manitou Experimental Forest Observatory.

| <b>BEACHON SRM08 (Southern Rocky Mountain 2008)</b>                                                                                               |                           |
|---------------------------------------------------------------------------------------------------------------------------------------------------|---------------------------|
| <b>Emphasis</b>                                                                                                                                   | <b>Citation</b>           |
| PTR-MS measurements of BVOC; interpretation of mass spectra                                                                                       | Kim et al. 2010           |
| Mass spectrometer measurements of neutral sulfuric acid clusters                                                                                  | Zhao et al. 2010          |
| Characterizing neutral clusters containing sulfuric acid and amines                                                                               | Zhao et al. 2011          |
| <b>BEACHON ROCS (Rocky Mountain Organic Study).<br/><a href="http://www.acd.ucar.edu/beachon/data/">http://www.acd.ucar.edu/beachon/data/</a></b> |                           |
| <b>Emphasis</b>                                                                                                                                   | <b>Citation</b>           |
| Nocturnal evapotranspiration in an open-canopy forest through isotopic analysis of H <sub>2</sub> O                                               | Berkelhammer et al., 2013 |
| Formaldehyde flux measurements using laser-induced fluorescence (LIF)                                                                             | DiGangi et al., 2011      |
| Fast glyoxal and formaldehyde measurements and comparison to other Ponderosa Pine forest                                                          | DiGangi et al., 2012      |
| Leaf and needle BVOC contribution to whole ecosystem fluxes                                                                                       | Greenberg et al., 2012    |
| Comparison of BVOC measurement techniques                                                                                                         | Kaser et al., 2013a       |
| Measurements and modeling results above-canopy ponderosa pine emissions                                                                           | Kaser et al., 2013b       |
| Evaluation of HO <sub>x</sub> sources in an ecosystem                                                                                             | Kim et al., 2013          |

dominated by MBO and MT emissions

|                                                                                                                                                                       |                         |
|-----------------------------------------------------------------------------------------------------------------------------------------------------------------------|-------------------------|
| Analysis of HO <sub>2</sub> and RO <sub>2</sub> budgets and chemical reactions at MEFO                                                                                | Wolfe et al., 2013      |
| <b>BEACHON RoMBAS (Rocky Mountain Biogenic Aerosol Study).</b><br><a href="http://rap.ucar.edu/projects/beachon/data/">http://rap.ucar.edu/projects/beachon/data/</a> |                         |
| <b>Emphasis</b>                                                                                                                                                       | <b>Citation</b>         |
| Exposed monoterpene resin effects on ecosystem MT emissions                                                                                                           | Eller et al., 2013      |
| Modeling ultra-fine particle formation and growth from SO <sub>2</sub> and biogenic precursors.                                                                       | Cui et al., 2014        |
| Measurements of particle and gaseous organic nitrate species.                                                                                                         | Fry et al., 2013        |
| Rain effects on the concentration of biological particles and ice condensation nuclei                                                                                 | Huffman et al., 2013    |
| Isoprene and 232-MBO measurements using NO <sup>+</sup> ionization mass spectrometry                                                                                  | Karl et al., 2012       |
| Year-long characterization of aerosol hygroscopicity                                                                                                                  | Levin et al., 2012      |
| Aerosol hygroscopicity and aerosol chemical composition in summer                                                                                                     | Levin et al., 2013      |
| Rain effects on populations of ice nuclei                                                                                                                             | Prenni et al., 2013     |
| Size- and time-dependent vertical aerosol flux measurements                                                                                                           | Pryor et al., 2013      |
| Cluster analysis to characterize constituents of bio-aerosol samples                                                                                                  | Robinson et al., 2013   |
| Seasonal cycles of fluorescent biological aerosol particles                                                                                                           | Schumacher et al., 2013 |
| Correlations between ice nuclei and fluorescent biological aerosol particles                                                                                          | Tobo et al., 2013       |
| Gas- and particle-phase partitioning of organic acids                                                                                                                 | Yatavelli et al., 2014  |
| Organosulfates as tracers for MBO-derived SOA formation                                                                                                               | Zhang et al., 2013      |

## Supplement References

Apel, E. C., Emmons, L. K., Karl, T., Flocke, F., Hills, A. J., Madronich, S., Lee-Taylor, J., Fried, A., Weibring, P., Walega, J., Richter, D., Tie, X., Mauldin, L., Campos, T., Weinheimer, A., Knapp, D., Sive, B., Kleinman, L., Springston, S., Zaveri, R., Ortega, J., Voss, P., Blake, D., Baker, A., Warneke, C., Welsh-Bon, D., de Gouw, J., Zheng, J., Zhang, R., Rudolph, J., Junkermann, W., and Riemer, D. D.: Chemical evolution of volatile organic compounds in the outflow of the Mexico City Metropolitan area, *Atmos. Chem. Phys.*, 10, 2353-2375, 2010.

Berkelhammer, M., Hu, J., Bailey, A., Noone, D.C. Still, C. Barnard, H. Gochis, D., Hsiao, G.S. Rahn, T., and Turnipseed, A.: The nocturnal water cycle in an open-canopy forest. *J. Geophys. Res-Atmos.*, DOI: 10.1002/jgrd.50701, 2013.

Cross, E. S., Hunter, J. F., Carrasquillo, A. J., Franklin, J. P., Herndon, S. C., Jayne, J. T., Worsnop, D. R., Miake-Lye, R. C., and Kroll, J. H.: Online measurements of the emissions of intermediate-volatility and semi-volatile organic compounds from aircraft, *Atmospheric Chemistry and Physics*, 13, 7845-7858, 10.5194/acp-13-7845-2013, 2013.

Cui, Y. Y., Hodzic, A., Smith, J. N., Ortega, J., Brioude, J., Matsui, H., Turnipseed, A., Winkler, P., and de Foy, B.: Modeling ultrafine particle growth at a pine forest site influenced by anthropogenic pollution during BEACHON-RoMBAS 2011, *Atmos. Chem. Phys. Discuss.*, 14, 5611–5651, doi:10.5194/acpd-14-5611-2014, 2014

Day, D. A., Wooldridge, P. J., Dillon, M. B., Thornton, J. A., and Cohen, R. C.: A thermal dissociation laser-induced fluorescence instrument for in situ detection of NO<sub>2</sub>, peroxy nitrates, alkyl nitrates, and HNO<sub>3</sub>, *Journal of Geophysical Research-Atmospheres*, 107, 14, 10.1029/2001jd000779, 2002.

DeCarlo, P. F., Kimmel, J. R., Trimborn, A., Northway, M. J., Jayne, J. T., Aiken, A. C., Gonin, M., Fuhrer, K., Horvath, T., Docherty, K. S., Worsnop, D. R., and Jimenez, J. L.: Field-deployable, high-resolution, time-of-flight aerosol mass spectrometer, *Analytical Chemistry*, 78, 8281-8289, 10.1021/ac061249n, 2006.

Dube, W. P., Brown, S. S., Osthoff, H. D., Nunley, M. R., Ciciora, S. J., Paris, M. W., McLaughlin, R. J., and Ravishankara, A. R.: Aircraft instrument for simultaneous, in situ measurement of NO<sub>3</sub> and N<sub>2</sub>O<sub>5</sub> via pulsed cavity ring-down spectroscopy, *Review of Scientific Instruments*, 77, 11, 10.1063/1.2176058, 2006.

DiGangi, J. P., Boyle, E. S., Karl, T., Harley, P., Turnipseed, A., Kim, S., Cantrell, C., Maudlin, R. L., Zheng, W., Flocke, F., Hall, S. R., Ullmann, K., Nakashima, Y., Paul, J. B., Wolfe, G. M., Desai, A. R., Kajii, Y., Guenther, A., and Keutsch, F. N.: First direct measurements of formaldehyde flux via eddy covariance: implications for missing in-canopy formaldehyde sources, *Atmos. Chem. Phys.*, 11, 10565-10578, 10.5194/acp-11-10565-2011, 2011.

DiGangi, J. P., Henry, S. B., Kammrath, A., Boyle, E. S., Kaser, L., Schnitzhofer, R., Graus, M., Turnipseed, A., Park, J. H., Weber, R. J., Hornbrook, R. S., Cantrell, C. A., Maudlin, R. L., Kim, S., Nakashima, Y., Wolfe, G. M., Kajii, Y., Apel, E. C., Goldstein, A. H., Guenther, A., Karl, T., Hansel, A., and Keutsch, F. N.: Observations of glyoxal and formaldehyde as metrics for the anthropogenic impact on rural photochemistry, *Atmos. Chem. Phys.*, 12, 9529-9543, 10.5194/acp-12-9529-2012, 2012.

Eisele, F. L., and Tanner, D. J.: ION-ASSISTED TROPOSPHERIC OH MEASUREMENTS, *Journal of Geophysical Research-Atmospheres*, 96, 9295-9308, 10.1029/91jd00198, 1991.

Eisele, F. L., and Tanner, D. J.: MEASUREMENT OF THE GAS-PHASE CONCENTRATION OF H<sub>2</sub>SO<sub>4</sub> AND METHANE SULFONIC-ACID AND ESTIMATES OF H<sub>2</sub>SO<sub>4</sub> PRODUCTION AND LOSS IN THE ATMOSPHERE, *Journal of Geophysical Research-Atmospheres*, 98, 9001-9010, 10.1029/93jd00031, 1993.

Eller, A. S. D., Harley, P., and Monson, R. K.: Potential contribution of exposed resin to ecosystem emissions of monoterpenes, *Atmospheric Environment*, 77, 440-444, 2013.

Fry, J. L., Draper, D. C., Zarzana, K. J., Campuzano-Jost, P., Day, D. A., Jimenez, J. L., Brown, S. S., Cohen, R. C., Kaser, L., Hansel, A., Cappellin, L., Karl, T., Hodzic-Roux, A., Turnipseed, A., Cantrell, C., Lefer, B. L., and Grossberg, N.: Observations of gas- and aerosol-phase organic nitrates at BEACHON-RoMBAS 2011, *Atmos. Chem. Phys.*, 13, 8585-8605, 2013.

Greenberg, J. P., Asensio, D., Turnipseed, A., Guenther, A. B., Karl, T., and Gochis, D.: Contribution of leaf and needle litter to whole ecosystem BVOC fluxes, *Atmos. Environ.*, 59, 302-311, 10.1016/j.atmosenv.2012.04.038, 2012.

Haman, C. L., Lefer, B., and Morris, G. A.: Seasonal Variability in the Diurnal Evolution of the Boundary Layer in a Near-Coastal Urban Environment, *Journal of Atmospheric and Oceanic Technology*, 29, 697-710, 10.1175/jtech-d-11-00114.1, 2012.

Hoffmann, T., Bandur, R., Hoffmann, S., and Warscheid, B.: On-line characterization of gaseous and particulate organic analytes using atmospheric pressure chemical ionization mass spectrometry, *Spectrochimica Acta Part B-Atomic Spectroscopy*, 57, 1635-1647, 10.1016/s0584-8547(02)00111-8, 2002.

Hottle, J. R., Huisman, A. J., Digangi, J. P., Kammrath, A., Galloway, M. M., Coens, K. L., Keutsch, F. N.: A Laser Induced Fluorescence-Based Instrument for In-Situ Measurements of Atmospheric Formaldehyde, *Environmental Science & Technology*, 43, 3, 790-795, 10.1021/es801621f, 2009.

Huffman, J. A., Docherty, K. S., Aiken, A. C., Cubison, M. J., Ulbrich, I. M., DeCarlo, P. F., Sueper, D., Jayne, J. T., Worsnop, D. R., Ziemann, P. J., and Jimenez, J. L.: Chemically-resolved

aerosol volatility measurements from two megacity field studies, *Atmospheric Chemistry and Physics*, 9, 7161-7182, 2009.

Huffman, J. A., Prenni, A. J., DeMott, P. J., Pohlker, C., Mason, R. H., Robinson, N. H., Frohlich-Nowoisky, J., Tobo, Y., Despres, V. R., Garcia, E., Gochis, D. J., Harris, E., Mueller-Germann, I., Ruzene, C., Schmer, B., Sinha, B., Day, D. A., Andreae, M. O., Jimenez, J. L., Gallagher, M., Kreidenweis, S. M., Bertram, A. K., and Poschl, U.: High concentrations of biological aerosol particles and ice nuclei during and after rain, *Atmos. Chem. Phys.*, 13, 6151-6164, 10.5194/acp-13-6151-2013, 2013.

Huisman, A. J., Hottle, J. R., Coens, K. L., DiGangi, J. P., Galloway, M. M., Kammrath, A., and Keutsch, F. N.: Laser-induced phosphorescence for the in situ detection of glyoxal at part per trillion mixing ratios, *Analytical Chemistry*, 80, 5884-5891, 10.1021/ac800407b, 2008.

Kang, E., Root, M. J., Toohey, D. W., and Brune, W. H.: Introducing the concept of Potential Aerosol Mass (PAM), *Atmospheric Chemistry and Physics*, 7, 5727-5744, 2007.

Karl, T., Hansel, A., Cappellin, L., Kaser, L., Herdinger-Blatt, I., and Jud, W.: Selective measurements of isoprene and 2-methyl-3-buten-2-ol based on NO<sup>+</sup> ionization mass spectrometry, *Atmos. Chem. Phys.*, 12, 11877-11884, 10.5194/acp-12-11877-2012, 2012.

Karl, T., Kaser, L., and Turnipseed, A.: Eddy covariance measurements of isoprene and 232-MBO based on NO<sup>+</sup> time-of-flight mass spectrometry, *Int. J. Mass. Spectrom.*, 365-366, 15-19, 2014.

Kaser, L., Karl, T., Schnitzhofer, R., Graus, M., Herdinger-Blatt, I. S., DiGangi, J. P., Sive, B., Turnipseed, A., Hornbrook, R. S., Zheng, W., Flocke, F. M., Guenther, A., Keutsch, F. N., Apel, E., and Hansel, A.: Comparison of different real time VOC measurement techniques in a ponderosa pine forest, *Atmos. Chem. Phys.*, 13, 2893-2906, 10.5194/acp-13-2893-2013, 2013.

Kaser, L., Karl, T., Guenther, A., Graus, M., Schnitzhofer, R., Turnipseed, A., Fischer, L., Harley, P., Madronich, M., Gochis, D., Keutsch, E. N., and Hansel, A.: Undisturbed and disturbed above canopy ponderosa pine emissions: PTR-TOF-MS measurements and MEGAN 2.1 model results, *Atmospheric Chemistry and Physics*, 13, 11935-11947, 10.5194/acp-13-11935-2013, 2013.

Kim, S., Karl, T., Guenther, A., Tyndall, G., Orlando, J., Harley, P., Rasmussen, R., and Apel, E.: Emissions and ambient distributions of Biogenic Volatile Organic Compounds (BVOC) in a ponderosa pine ecosystem: interpretation of PTR-MS mass spectra, *Atmos. Chem. Phys.*, 10, 1759-1771, 2010.

Kim, S., Wolfe, G. M., Mauldin, L., Cantrell, C., Guenther, A., Karl, T., Turnipseed, A., Greenberg, J., Hall, S. R., Ullmann, K., Apel, E., Hornbrook, R., Kajii, Y., Nakashima, Y., Keutsch, F. N., DiGangi, J. P., Henry, S. B., Kaser, L., Schnitzhofer, R., Graus, M., Hansel, A., Zheng, W., and Flocke, F. F.: Evaluation of HO<sub>x</sub> sources and cycling using measurement-constrained model calculations in a 2-methyl-3-butene-2-ol (MBO) and monoterpene (MT) dominated ecosystem, *Atmos. Chem. Phys.*, 13, 2031-2044, 10.5194/acp-13-2031-2013, 2013.

Levin, E. J. T., Prenni, A. J., Petters, M. D., Kreidenweis, S. M., Sullivan, R. C., Atwood, S. A., Ortega, J., DeMott, P. J., and Smith, J. N.: An annual cycle of size-resolved aerosol hygroscopicity at a forested site in Colorado, *J. Geophys. Res-Atmos.*, 117, 10.1029/2011jd016854, 2012.

Levin, E. J. T., Prenni, A. J., Palm, B., Day, D., Campuzano-Jost, P., Winkler, P. M., Kreidenweis, S. M., DeMott, P. J., Jimenez, J., Smith, J. N.: Size-resolved aerosol composition and link to hygroscopicity at a forested site in Colorado, *Atmospheric Chemistry and Physics*, 14, 2657-2667, 10.5194/acp-14-2657-2014, 2014.

Ortega, A. M., Day, D. A., Cubison, M. J., Brune, W. H., Bon, D., de Gouw, J. A., Jimenez, J. L.: Secondary organic aerosol formation and primary organic aerosol oxidation from biomass burning smoke in a flow reactor during FLAME-3. *Atmospheric Chemistry and Physics*, 13, 11551-11571, 10.5194/acp-13-11551-2013, 2013.

Prenni, A. J., Tobo, Y., Garcia, E., DeMott, P. J., Huffman, J. A., McCluskey, C. S., Kreidenweis, S. M., Prenni, J. E., Pohlker, C., and Poschl, U.: The impact of rain on ice nuclei populations at a forested site in Colorado, *Geophys. Res. Lett.*, 40, 227-231, 10.1029/2012gl053953, 2013.

Pryor, S.C., Barthelmie, R. J., and Hornsby, K. E.: Size-resolved particle fluxes and vertical gradients over and in a sparse pine forest. *Aerosol Sci. and Tech.*, 47, 1248-1257, 2013.

Robinson, N. H., Allan, J. D., Huffman, J. A., Kaye, P. H., Foot, V. E., and Gallagher, M.: Cluster analysis of WIBS single-particle bioaerosol data, *Atmospheric Measurement Techniques*, 6, 337-347, 10.5194/amt-6-337-2013, 2013.

Rogers, D. C., DeMott, P. J., Kreidenweis, S. M., and Chen, Y. L.: A continuous-flow diffusion chamber for airborne measurements of ice nuclei, *Journal of Atmospheric and Oceanic Technology*, 18, 725-741, 10.1175/1520-0426(2001)018<0725:acfdcf>2.0.co;2, 2001.

Rollins, A. W., Smith, J. D., Wilson, K. R., and Cohen, R. C.: Real Time In Situ Detection of Organic Nitrates in Atmospheric Aerosols, *Environmental Science & Technology*, 44, 5540-5545, 10.1021/es100926x, 2010.

Sadanaga, Y., Yoshino, A., Watanabe, K., Yoshioka, A., Wakazono, Y., Kanaya, Y., Kajii, Y.:

Development of a measurement system of OH reactivity in the atmosphere by using a laser-induced pump and probe technique, *Rev. Sci. Instrum.*, 75, 8, 2648-2655, DOI: 10.1063/1.1775311, 2004.

Schumacher, C. J., Pöhlker, C., Aalto, P., Hiltunen, V., Petäjä, T., Kulmala, M., Pöschl, U., and Huffman, J. A.: Seasonal cycles of fluorescent biological aerosol particles in boreal and semi-arid forests of Finland and Colorado. *Atmospheric Chemistry and Physics*, 13, 11987-12001, 10.5194/acp-13-11987-2013, 2013.

Smith, J. N., Moore, K. F., McMurry, P. H., and Eisele, F. L.: Atmospheric measurements of sub-20 nm diameter particle chemical composition by thermal desorption chemical ionization mass spectrometry, *Aerosol Science and Technology*, 38, 100-110, 10.1080/02786820490249036, 2004.

Tobo, Y., Prenni, A.J., DeMott, P.J., Huffman, J.A., McCluskey, C.S., Tian, G., Pöhlker, C., Pöschl, U., Kreidenweis, S.M.: Biological aerosol particles as a key determinant of ice nuclei populations in a forest ecosystem. *J. Geophys. Res-Atmos.*, 118, 10100-10110, doi:10.1002/jgrd.50801, 2013.

Vogel, A. L., Aijala, M., Brüggemann, M., Ehn, M., Junninen, H., Petaja, T., Worsnop, D. R., Kulmala, M., Williams, J., and Hoffmann, T.: Online atmospheric pressure chemical ionization ion trap mass spectrometry (APCI-IT-MSn) for measuring organic acids concentrated bulk aerosol - a laboratory and field study, *Atmospheric Measurement Techniques*, 6, 431-443, 10.5194/amt-6-431-2013, 2013.

Wagner, N. L., Dubé, W. P., Washenfelder, R. A., Young, C. J., Pollack, I. B., Ryerson, T. B., and Brown, S. S.: Diode laser-based cavity ring-down instrument for NO<sub>3</sub>, N<sub>2</sub>O<sub>5</sub>, NO, NO<sub>2</sub> and O<sub>3</sub> from aircraft, *Atmos. Meas. Tech.*, 4, 1227-1240, 2011.

Wolfe, G. M., Cantrell, C., Kim, S., Mauldin III, R. L., Karl, T., Harley, P., Turnipseed, A., Zheng, W., Flocke, F., Apel, E. C., Hornbrook, R. S., Hall, S. R., Ullmann, K., Henry, S. B., DiGangi, J. P., Boyle, E. S., Kaser, L., Schnitzhofer, R., Hansel, A., Graus, M., Nakashima, Y., Kajii, Y., Guenther, A., Keutsch, R. N.: Missing peroxy radical sources within a summertime ponderosa pine forest, *Atmospheric Chemistry and Physics*, 14, 4715-4732, doi:10.5194/acp-14-4715-2014, 2014.

Yatavelli, R. L. N., Lopez-Hilfiker, F., Wargo, J. D., Kimmel, J. R., Cubison, M. J., Bertram, T. H., Jimenez, J. L., Gonin, M., Worsnop, D. R., and Thornton, J. A.: A Chemical Ionization High-Resolution Time-of-Flight Mass Spectrometer Coupled to a Micro Orifice Volatilization Impactor (MOVI-HRToF-CIMS) for Analysis of Gas and Particle-Phase Organic Species, *Aerosol Science and Technology*, 46, 1313-1327, 10.1080/02786826.2012.712236, 2012.

Yatavelli, R. L. N., Stark, H., Thompson, S. L., Kimmel, J. R., Cubison, M. J., Day, D. A., Campuzano-Jost, P., Palm, B. B., Hodzic, A., Thornton, J. A., Jayne, J. T., Worsnop, D. R., and Jimenez, J. L.: Semicontinuous measurements of gas-particle partitioning of organic acids in a



ponderosa pine forest using a MOVI-HRToF-CIMS, *Atmospheric Chemistry and Physics*, 14, 1527-1546, 10.5194/acp-14-1527-2014, 2014.

Zhang, H. F., Worton, D. R., Lewandowski, M., Ortega, J., Rubitschun, C. L., Park, J. H., Kristensen, K., Campuzano-Jost, P., Day, D. A., Jimenez, J. L., Jaoui, M., Offenberg, J. H., Kleindienst, T. E., Gilman, J., Kuster, W. C., de Gouw, J., Park, C., Schade, G. W., Frossard, A. A., Russell, L., Kaser, L., Jud, W., Hansel, A., Cappellin, L., Karl, T., Glasius, M., Guenther, A., Goldstein, A. H., Seinfeld, J. H., Gold, A., Kamens, R. M., and Surratt, J. D.: Organosulfates as Tracers for Secondary Organic Aerosol (SOA) Formation from 2-Methyl-3-Buten-2-ol (MBO) in the Atmosphere, *Environ. Sci. Technol.*, 46, 9437-9446, 10.1021/es301648z, 2012.

Zhao, J., Eisele, F. L., Titcombe, M., Kuang, C. G., and McMurry, P. H.: Chemical ionization mass spectrometric measurements of atmospheric neutral clusters using the cluster-CIMS, *J. Geophys. Res-Atmos.*, 115, 19, 10.1029/2009jd012606, 2010.

Zhao, J., Smith, J. N., Eisele, F. L., Chen, M., Kuang, C., and McMurry, P. H.: Observation of neutral sulfuric acid-amine containing clusters in laboratory and ambient measurements, *Atmos. Chem. Phys.*, 11, 10823-10836, 10.5194/acp-11-10823-2011, 2011.

Zhao, Y. L., Kreisberg, N. M., Worton, D. R., Teng, A. P., Hering, S. V., and Goldstein, A. H.: Development of an In Situ Thermal Desorption Gas Chromatography Instrument for Quantifying Atmospheric Semi-Volatile Organic Compounds, *Aerosol Science and Technology*, 47, 258-266, 10.1080/02786826.2012.747673, 2013.
